# Supplementary material for: Mononuclear Mn complexes featuring N,S-/N,N-donor and 1,3,5-triaza-7-phosphaadamantane ligands: synthesis and electrocatalytic properties
Source: Royal Society of Chemistry journal article supplement (doi:10.1039/d1nj02104d), 2021-01-01
Supplement: d1nj02104d1.pdf [file d1nj02104d1.pdf]

**Mononuclear Mn Complexes Featuring N, S-/N, N-donor and 1,3,5-triaza-7-phosphaadamantane ligands: Synthesis and Electrocatalytic Properties**

Vishakha Kaim and Sandeep Kaur-Ghumaan\*

Department of Chemistry, University of Delhi, Delhi 110007, India

Email: [skaur@chemistry.du.ac.in](mailto:skaur@chemistry.du.ac.in)

**Electronic Supplementary Information**

***New Journal of Chemistry***

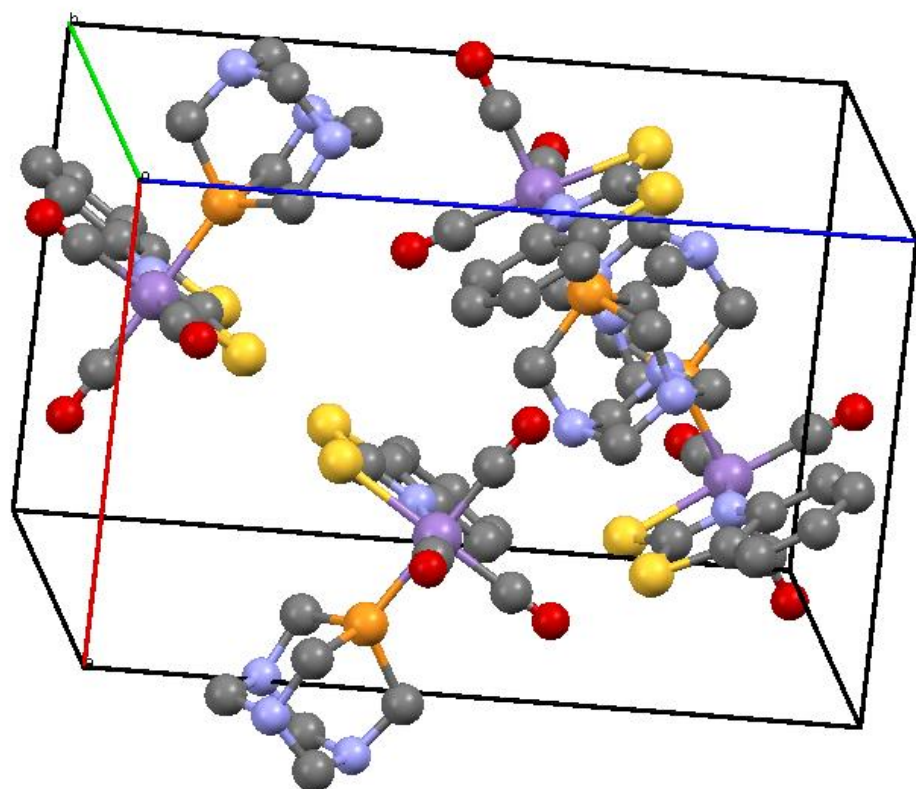

**Figure S1.** Crystal packing of complex **1** along the *b* axis.

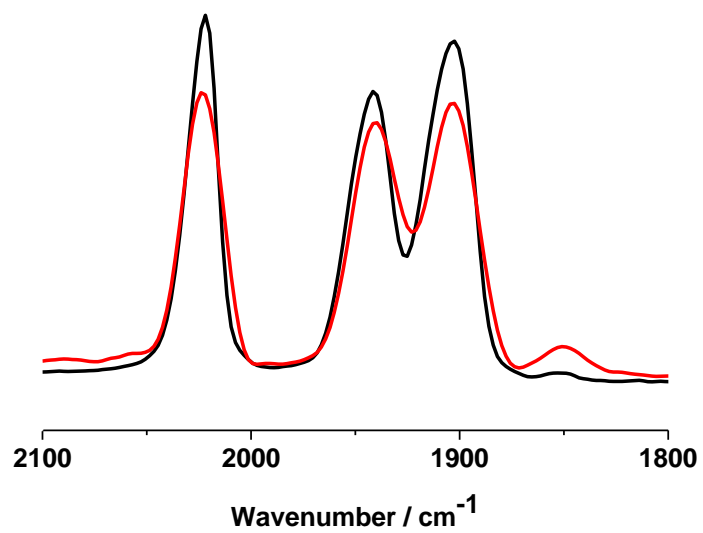

**Figure S2.** FTIR spectra for complexes **1** (—) and **2** (—) in dichloromethane.

a)

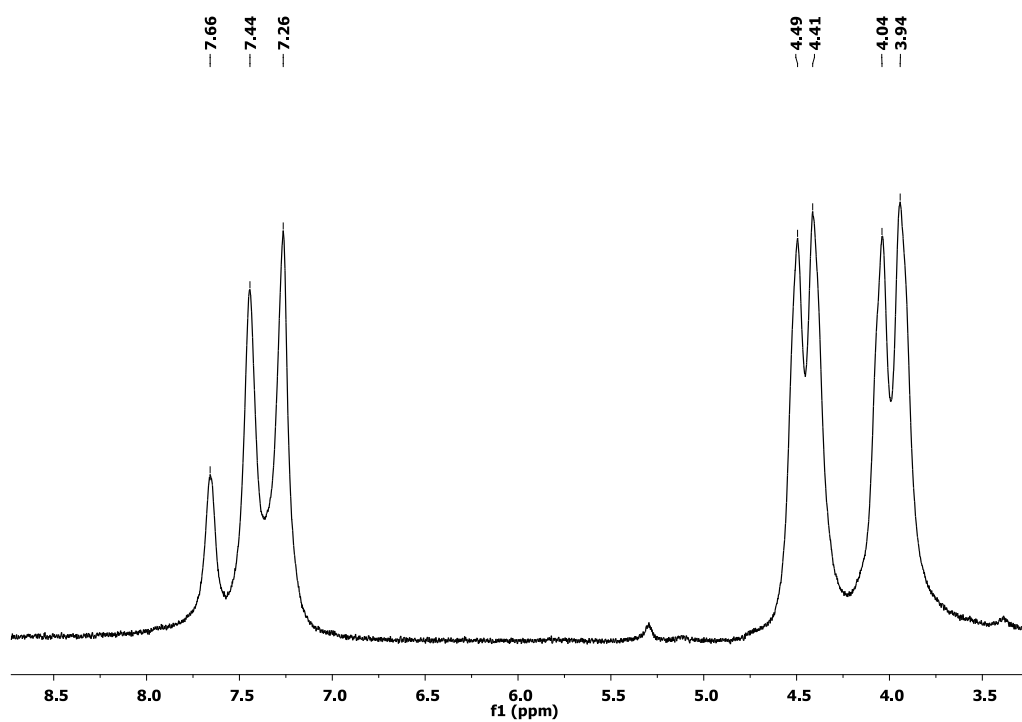

b)

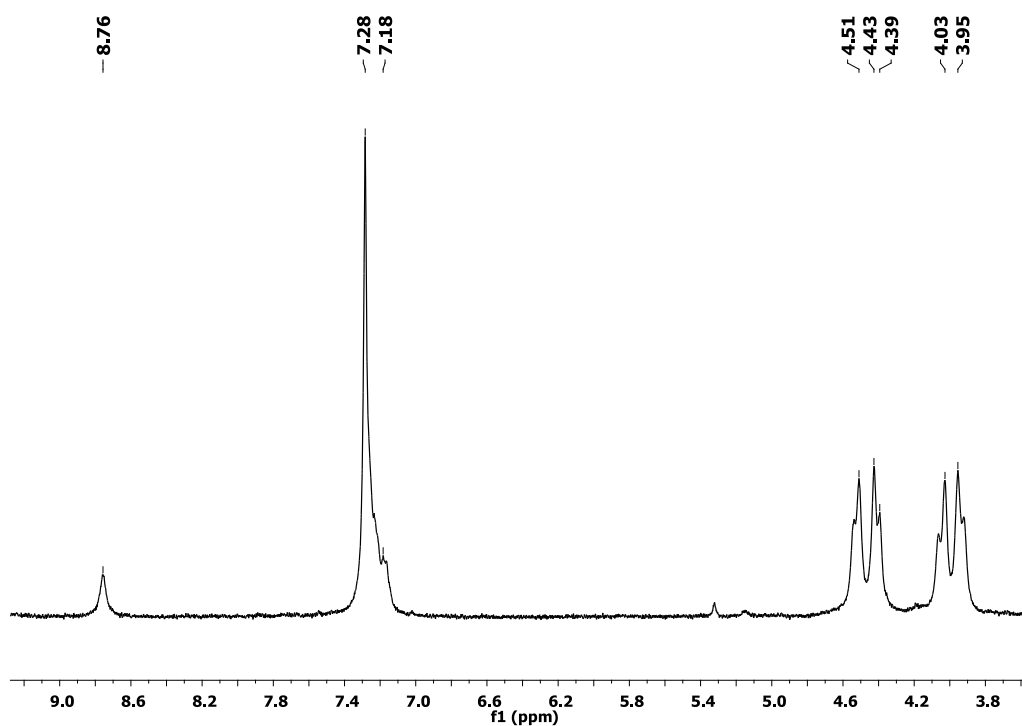

**Figure S3.** <sup>1</sup>H NMR spectra for complexes (a) **1** and (b) **2** (400 MHz, CDCl<sub>3</sub>, 298 K).

(a)

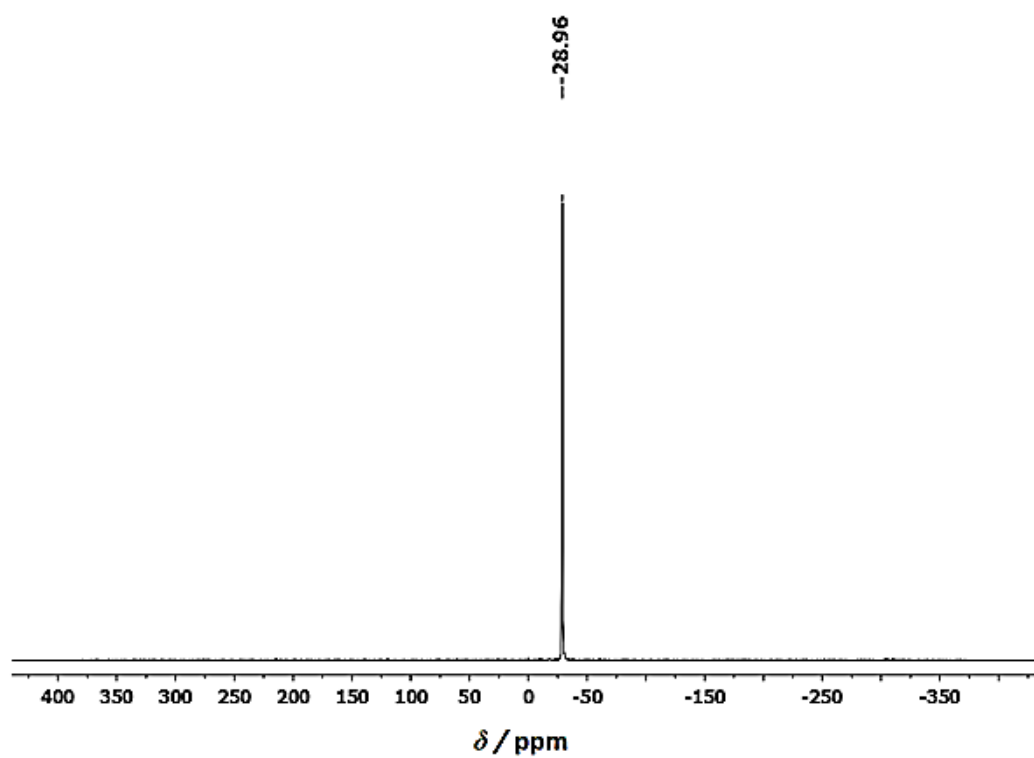

(b)

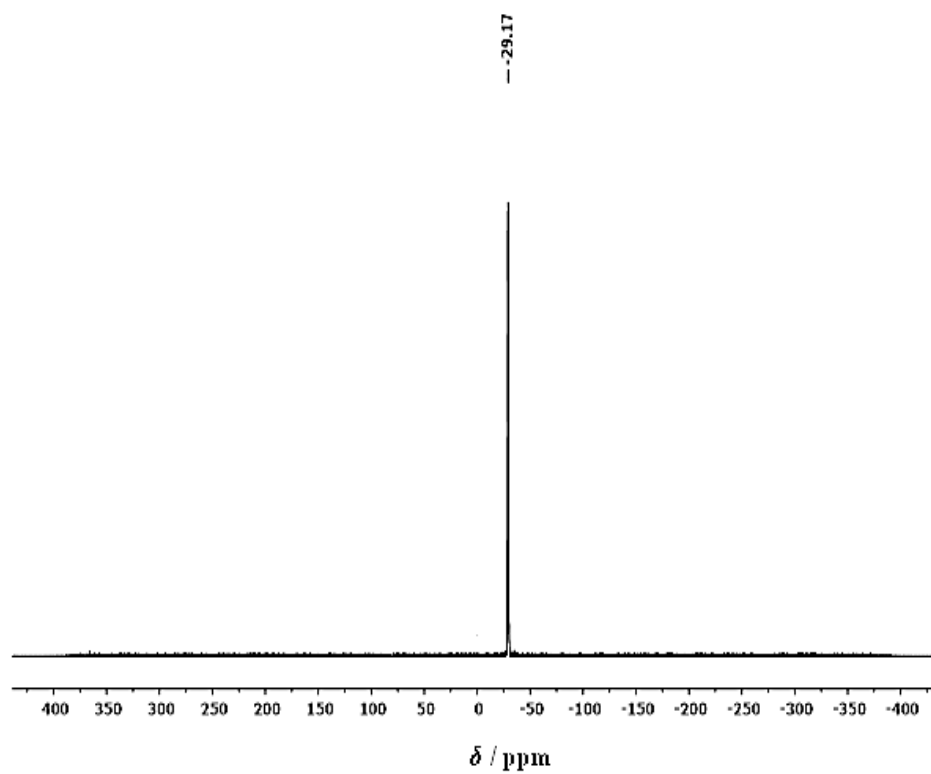

**Figure S4.**  $^{31}\text{P}$   $\{^1\text{H}\}$  NMR spectra for complexes (a) **1** and (b) **2** (161.8 MHz,  $\text{CDCl}_3$ , 298 K).

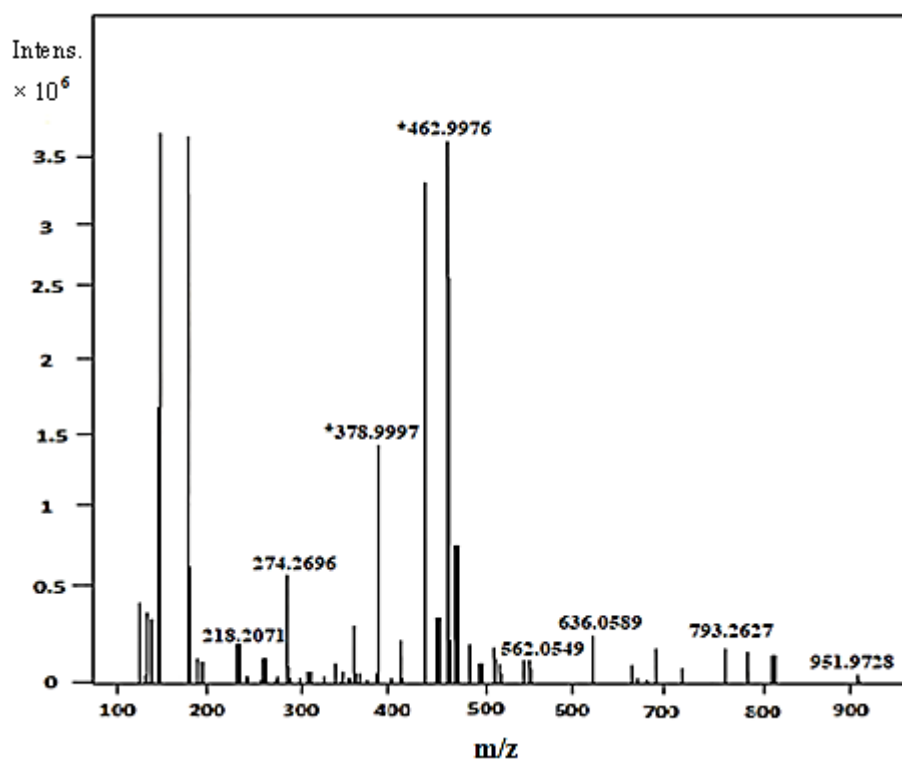

**Figure S5.** Mass spectrum in acetonitrile for complex **1**,  $m/z$ :  $M^+$  peak at 462.99.

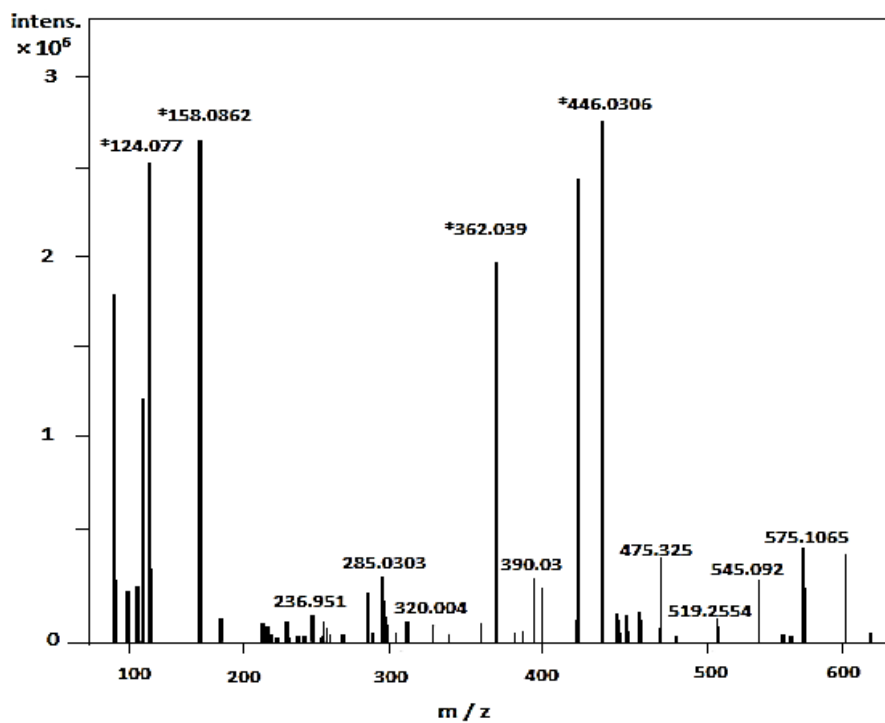

**Figure S6.** Mass spectrum in acetonitrile for complex **2**,  $m/z$ :  $M^+$  peak at 446.03.

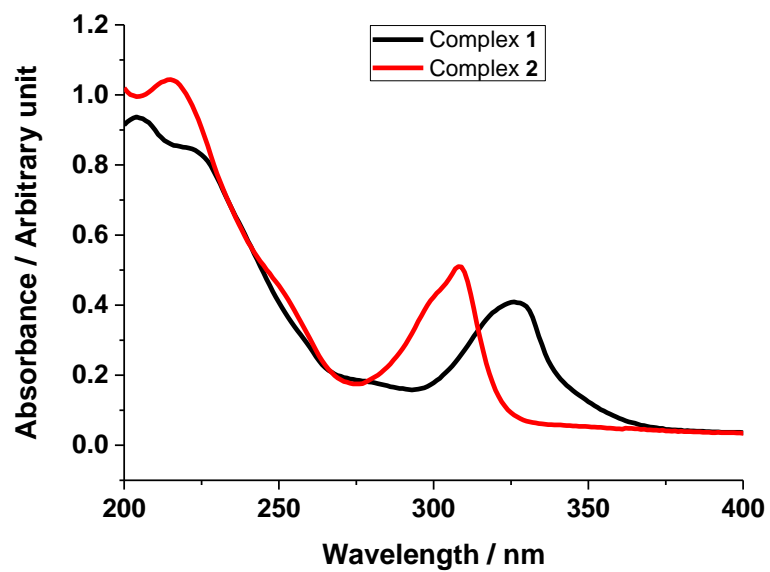

**Figure S7.** UV-Vis absorption spectra for complexes **1** (—) and **2** (—) in acetonitrile.



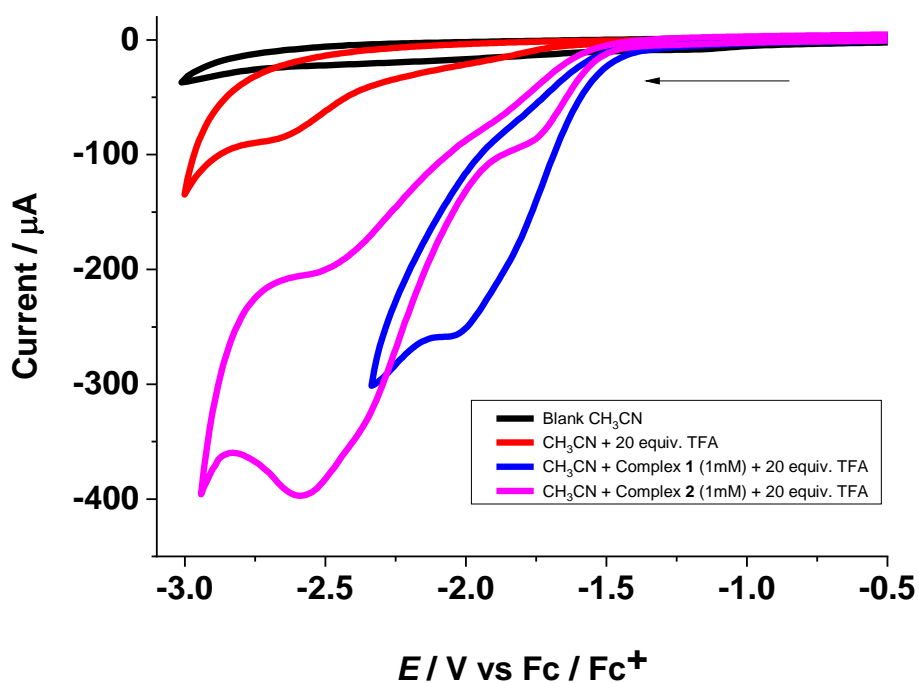

**Figure S8.** Cyclic voltammograms ( $0.1 \text{ Vs}^{-1}$ ) of  $\text{CH}_3\text{CN}$  (—), of  $\text{CH}_3\text{CN}$  and 19 mM (20 equiv.) TFA (—), of **1** (1 mM) (—) and of **2** (1 mM) (—) in the presence of 19 mM (20 equiv.) of TFA in  $\text{CH}_3\text{CN}$  at  $0.1 \text{ Vs}^{-1}$ .

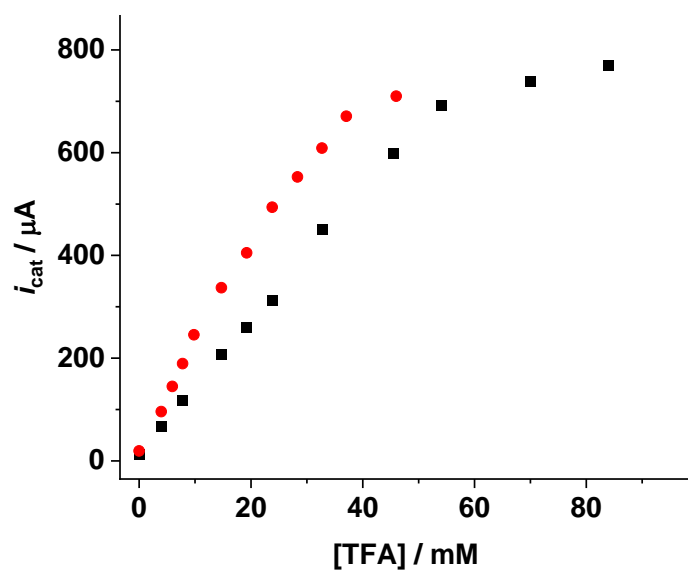

**Figure S9.** Plots of  $i_{cat}$  vs. [TFA]/mM for complexes **1** (■) and **2** (●) in 0.1 M [N(n-Bu<sub>4</sub>)]PF<sub>6</sub> / CH<sub>3</sub>CN. The negative sign for  $i_{cat}$  has been ignored.

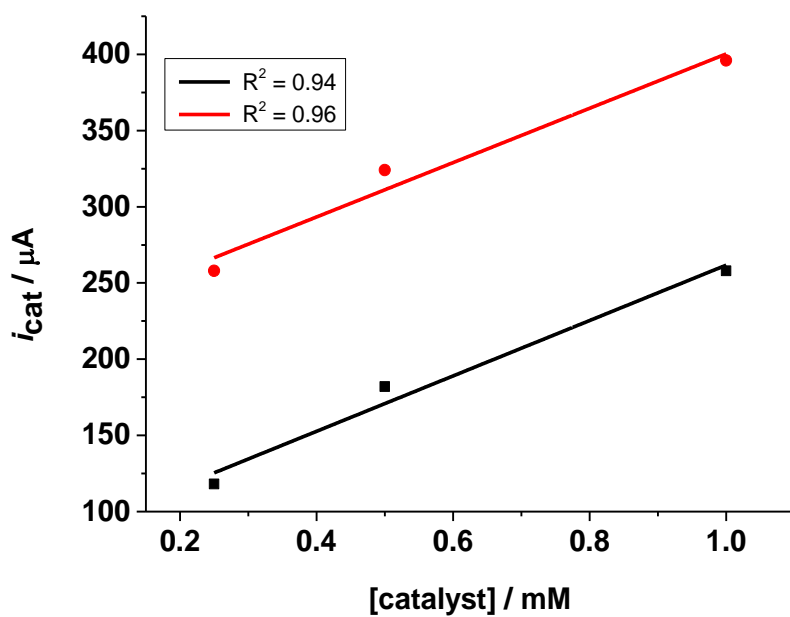

**Figure S10.** Dependence of  $i_{cat}$  on [catalyst] for complexes **1** (■) and **2** (●) in  $CH_3CN$  in the presence of 20 equiv. (19 mM) TFA. Lines are best fit lines to the data. The negative sign for  $i_{cat}$  has been ignored.

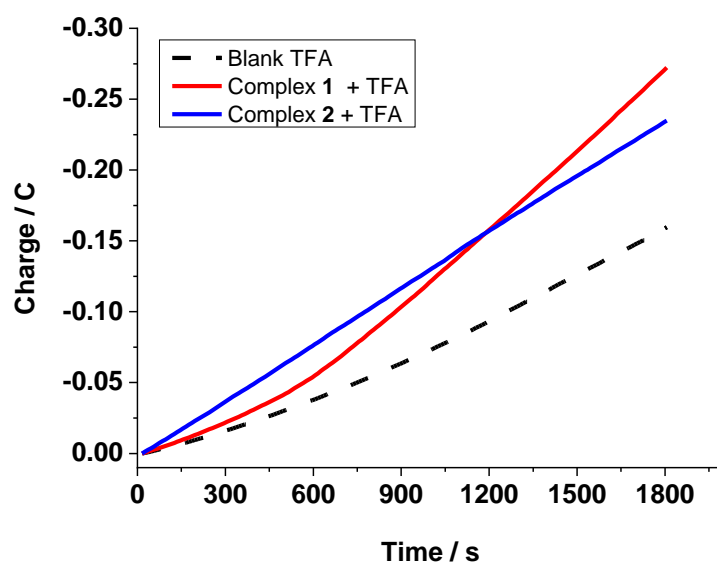

**Figure S11.** Plots of charge vs. time for controlled-potential electrolysis of blank TFA (---, 5.95 mM), complexes **1** (—) and **2** (—) (0.25 mM) in CH<sub>3</sub>CN / 0.1 M [N(n-Bu<sub>4</sub>)] [PF<sub>6</sub>] / 5.95 mM (20 equiv.) TFA.

$$TOF = \frac{\Delta C}{F \cdot n_1 \cdot n_2 \cdot t} = \frac{0.1198 \text{ C}}{96480 \text{ C} \cdot \text{mol}^{-1} \times 2 \times 2.5 \times 10^{-6} \text{ mol} \times 1800} = 1.38 \times 10^{-4} \text{ s}^{-1}$$

**Eq. S1.** The calculation of *TOF*-complex **1** (TFA).

$$TOF = \frac{\Delta C}{F \cdot n_1 \cdot n_2 \cdot t} = \frac{0.0799 \text{ C}}{96480 \text{ C} \cdot \text{mol}^{-1} \times 2 \times 2.5 \times 10^{-6} \text{ mol} \times 1800} = 0.92 \times 10^{-4} \text{ s}^{-1}$$

**Eq. S2.** The calculation of *TOF*- complex **2** (TFA).

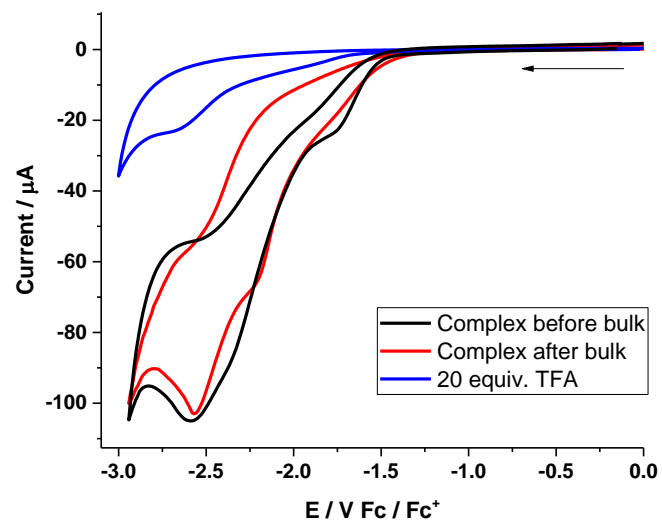

**Figure S12.** CVs of  $\text{CH}_3\text{CN}/20$  equiv. TFA (—), and complex **2** (0.25 mM) in  $\text{CH}_3\text{CN}$  in the presence of 5.95 mM (20 equiv.) TFA before (—) and after (—) 30 min of bulk electrolysis.

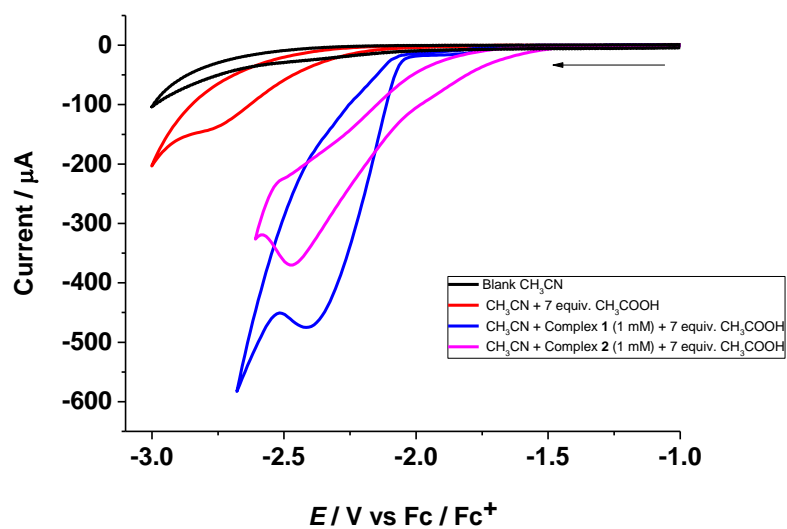

**Figure S13.** Cyclic voltammograms ( $0.1 \text{ Vs}^{-1}$ ) of  $\text{CH}_3\text{CN}:\text{H}_2\text{O}$  (1:1) (—), of  $\text{CH}_3\text{CN}:\text{H}_2\text{O}$  (1:1) and 7 mM (7 equiv.)  $\text{CH}_3\text{COOH}$  (—), of 1 mM **1** (—) and **2** (—) in the presence of 7 mM (7 equiv.) of  $\text{CH}_3\text{COOH}$  in  $\text{CH}_3\text{CN}:\text{H}_2\text{O}$  (1:1) at  $0.1 \text{ Vs}^{-1}$ .

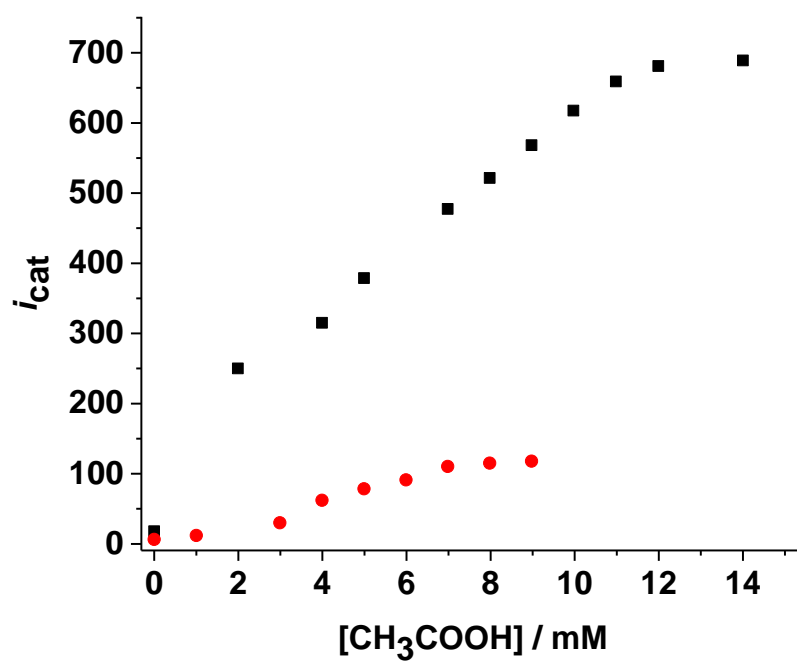

**Figure S14.** Plots of  $i_{cat}$  vs.  $[CH_3COOH]$  / mM for complexes **1** (■) and **2** (●) in 0.1 M  $[N(n-Bu_4)][PF_6]$  /  $CH_3CN:H_2O$  (1:1). The negative sign for  $i_{cat}$  has been ignored.

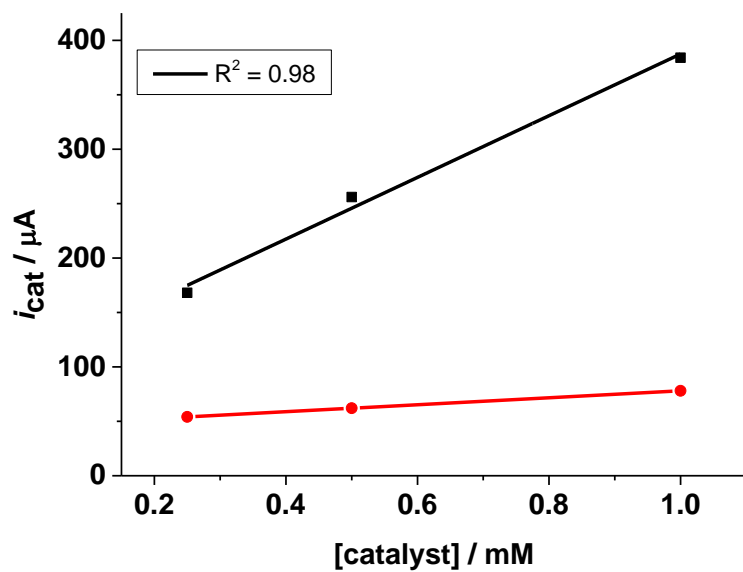

**Figure S15.** Dependence of  $i_{cat}$  on catalyst concentration for complexes **1** (■) and **2** (●) in 0.1 M  $[\text{N}(\text{n-Bu}_4)][\text{PF}_6]$  /  $\text{CH}_3\text{CN}:\text{H}_2\text{O}$  (1:1) in the presence of 7 equiv. (7 mM)  $\text{CH}_3\text{COOH}$ . Lines are best fit lines to the data. The negative sign for  $i_{cat}$  has been ignored.



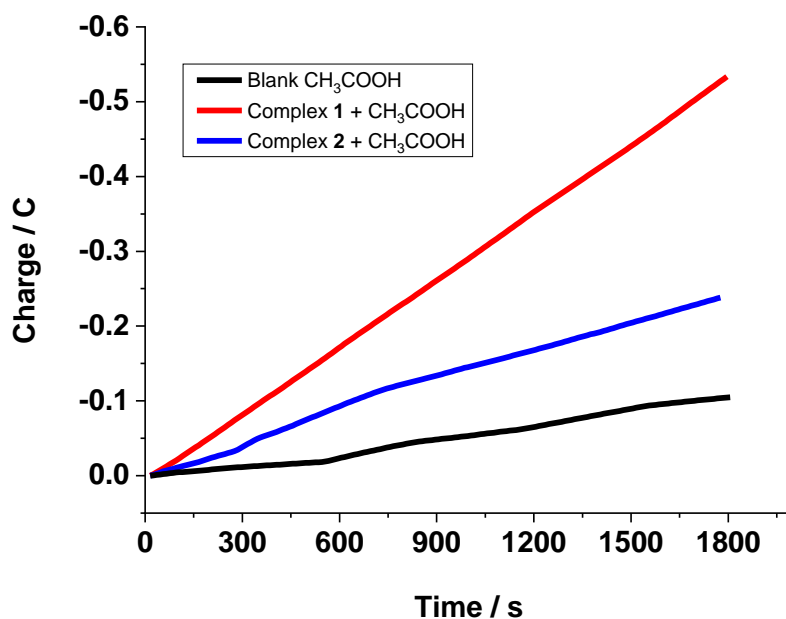

**Figure S16.** Plots of charge vs. time for controlled-potential electrolysis of blank  $\text{CH}_3\text{COOH}$  (—), complexes **1** (—), and **2** (—) (0.25 mM) in  $\text{CH}_3\text{CN} : \text{H}_2\text{O} / 0.1 \text{ M } [\text{N}(\text{n-Bu}_4)][\text{PF}_6] / 6 \text{ mM (6 equiv.) } \text{CH}_3\text{COOH}$ .

$$TOF = \frac{\Delta C}{F \cdot n_1 \cdot n_2 \cdot t} = \frac{0.4168 \text{ C}}{96480 \text{ C} \cdot \text{mol}^{-1} \times 2 \times 2.5 \times 10^{-6} \text{ mol} \times 1800} = 4.8 \times 10^{-4} \text{ s}^{-1}$$

**Eq. S3.** The calculation of *TOF*-complex **1** (Acetic acid).

$$TOF = \frac{\Delta C}{F \cdot n_1 \cdot n_2 \cdot t} = \frac{0.1337 \text{ C}}{96480 \text{ C} \cdot \text{mol}^{-1} \times 2 \times 2.5 \times 10^{-6} \text{ mol} \times 1800} = 1.54 \times 10^{-4} \text{ s}^{-1}$$

**Eq. S4.** The calculation of *TOF*- complex **2** (Acetic acid).

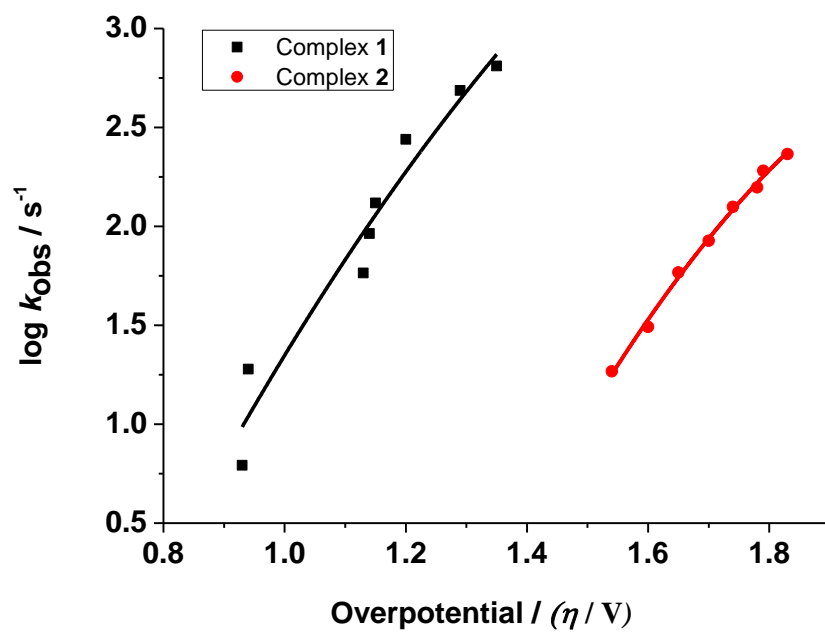

**Figure S17.** Tafel plots of  $\log k_{\text{obs}}$  vs. overpotential for complexes **1** (■) and **2** (●) ( $\text{CH}_3\text{CN}$ ).

**Table S1.** Selected bond lengths (Å) and angles (°) for complex **1**.

| Bond lengths (Å) |            | Bond angles (°) |           |
|------------------|------------|-----------------|-----------|
| Mn(1)-P(1)       | 2.3049(19) | P(1)-Mn(1)-S(1) | 88.57(7)  |
| Mn(1)-S(1)       | 2.444(2)   | P(1)-Mn(1)-C(4) | 86.56(16) |
| Mn(1)-N(1)       | 2.063(6)   | S(1)-Mn(1)-C(4) | 39.15(16) |
| Mn(1)-C(4)       | 2.627(7)   | N(1)-Mn(1)-P(1) | 85.85(18) |
| Mn(1)-C(2)       | 1.867(10)  | N(1)-Mn(1)-S(1) | 68.78(17) |
| Mn(1)-C(3)       | 1.833(7)   | N(1)-Mn(1)-C(4) | 29.6(2)   |
| Mn(1)-C(10)      | 1.807(7)   | C(2)-Mn(1)-P(1) | 90.0(2)   |
| P(1)-C(16)       | 1.854(6)   | C(2)-Mn(1)-S(1) | 170.1(2)  |
| P(1)-C(12)       | 1.838(7)   | C(2)-Mn(1)-N(1) | 101.3(3)  |
| P(1)-C(11)       | 1.850(7)   | C(2)-Mn(1)-C(4) | 130.9(3)  |
| S(2)-C(4)        | 1.743(7)   | C(3)-Mn(1)-P(1) | 179.7(2)  |
| S(2)-C(10)       | 1.758(7)   | C(3)-Mn(1)-S(1) | 91.1(2)   |
| S(1)-C(4)        | 1.707(7)   | C(3)-Mn(1)-N(1) | 94.0(3)   |
| N(1)-C(5)        | 1.396(9)   | C(3)-Mn(1)-C(4) | 93.2(3)   |
| N(1)-C(4)        | 1.317(9)   | C(3)-Mn(1)-C(2) | 90.3(3)   |
| O(1)-C(1)        | 1.148(8)   | C(1)-Mn(1)-P(1) | 90.4(2)   |
| O(3)-C(3)        | 1.143(9)   | C(1)-Mn(1)-S(1) | 95.9(2)   |
| O(2)-C(2)        | 0.980(9)   | C(1)-Mn(1)-N(1) | 164.3(2)  |
|                  |            | C(1)-Mn(1)-C(4) | 135.0(3)  |
|                  |            | C(1)-Mn(1)-C(2) | 93.9(3)   |
|                  |            | C(1)-Mn(1)-C(3) | 89.7(3)   |

**Table S2.** FTIR data for complexes **A**, **B**, **1** and **2** in dichloromethane.

| Complexes                                                                                              | Wavenumber / $\text{cm}^{-1}$ |
|--------------------------------------------------------------------------------------------------------|-------------------------------|
| $[\text{Mn}_2(\text{CO})_6(\mu\text{-S}_2\text{NC}_7\text{H}_4)_2]$ <b>A</b>                           | 2036, 2012, 1919              |
| $[\text{Mn}_2(\text{CO})_6(\mu\text{-SN}_2\text{C}_7\text{H}_5)_2]$ <b>B</b>                           | 2032, 2015, 1963, 1920        |
| <i>fac</i> - $[\text{Mn}(\text{CO})_3(\kappa^2\text{-S}_2\text{NC}_7\text{H}_4)(\text{PTA})]$ <b>1</b> | 2022, 1941, 1902              |
| <i>fac</i> - $[\text{Mn}(\text{CO})_3(\kappa^2\text{-SN}_2\text{C}_7\text{H}_5)(\text{PTA})]$ <b>2</b> | 2021, 1940, 1903              |

**Table S3.** UV-Vis data for complexes **1** and **2** in acetonitrile.

| Complexes                                                                                              | Wavelength / nm       |
|--------------------------------------------------------------------------------------------------------|-----------------------|
| <i>fac</i> - $[\text{Mn}(\text{CO})_3(\kappa^2\text{-S}_2\text{NC}_7\text{H}_4)(\text{PTA})]$ <b>1</b> | 326, 222(sh), 204(sh) |
| <i>fac</i> - $[\text{Mn}(\text{CO})_3(\kappa^2\text{-SN}_2\text{C}_7\text{H}_5)(\text{PTA})]$ <b>2</b> | 308, 214(sh)          |
